# Supplementary material for: Self-assembled nanoparticles based on a cationic conjugated polymer/hyaluronan–cisplatin complex as a multifunctional platform for simultaneous tumor-targeting cell imaging and drug delivery
Source: Royal Society of Chemistry journal article supplement (doi:10.1039/c6nj04128k), 2017-01-01
Supplement: c6nj04128k1.pdf [file c6nj04128k1.pdf]

## Supplementary information (New Journal of Chemistry)

### Self-assembled Nanoparticles Based on Cationic Conjugated Polymer/Hyaluronan-Cisplatin Complex as Multifunctional Platform for Simultaneous Tumor-Targeting Cell Imaging and Drug Delivery

Yan-Qin Huang,<sup>1,\*</sup> Rui Zhang,<sup>3,\*</sup> Yong-Kang Zhao,<sup>1</sup> Hao Chen,<sup>1</sup> Rong-Cui Jiang,<sup>1</sup> Xing-Fen Liu,<sup>1</sup> Qu-Li Fan,<sup>1</sup> Lian-Hui Wang,<sup>1</sup> Wei Huang<sup>1,2,\*</sup>

(1. Key Laboratory for Organic Electronics & Information Displays (KLOEID) and Institute of Advanced Materials (IAM), Jiangsu National Synergetic Innovation Center for Advanced Materials (SICAM), Nanjing University of Posts & Telecommunications, Nanjing 210023, China.

2. Key Laboratory of Flexible Electronics (KLOFE) & Institute of Advanced Materials (IAM), Jiangsu National Synergetic Innovation Center for Advanced Materials (SICAM), Nanjing Tech University (NanjingTech), 30 South Puzhu Road, Nanjing 211816, China

3. Department of Ophthalmology, Zhongda Hospital, Southeast University, Nanjing 211189, China.)

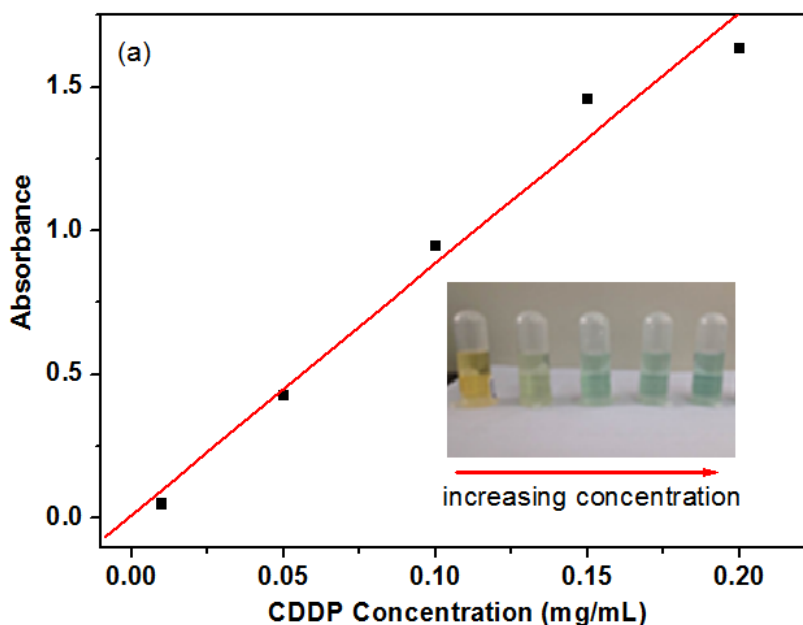

\* To whom correspondence should be addressed: E-mail: iamyqhuang@njupt.edu.cn, Tel +86 25 8586 6396, Fax +86 25 8586 6396; E-mail: wei-huang@njtech.edu.cn, Fax: +86 25 5813 9988; Tel: +86 25 5813 9001.

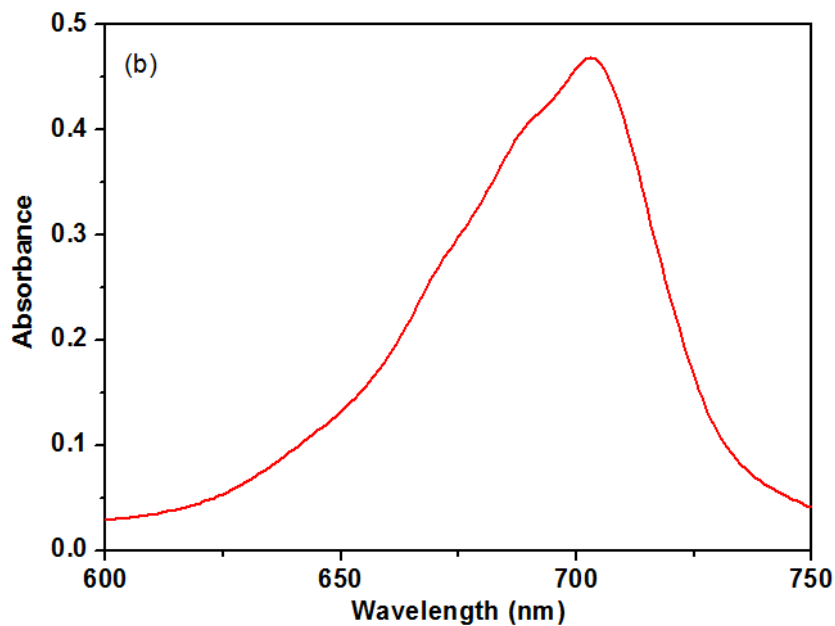

Figure S1. (a) Dependence of UV-vis absorbance of 1,2-phenylenediamine-CDDP complex at 703 nm as a function of CDDP concentration. The inset shows that the color of the 1,2-phenylenediamine-CDDP complex solution changed gradually from yellow to blue with the increase of CDDP concentration. (b) UV-vis absorption of the 1,2-phenylenediamine-CDDP complex obtained from the HCNPs sample.

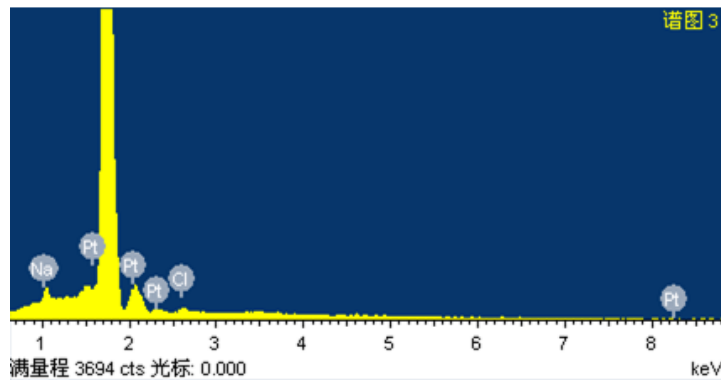

Figure S2. Energy-dispersive X-ray spectroscopy spectrum.

Table S1. Corresponding element composition analysis of HCNPs.

| Element | Weight ratio (%) | Atomic ratio (%) |
|---------|------------------|------------------|
| C       | 39.47            | 49.73            |
| N       | 7.60             | 8.21             |
| O       | 42.79            | 40.47            |
| Na      | 1.12             | 0.74             |
| Cl      | 0.43             | 0.18             |
| Pt      | 8.59             | 0.67             |
| Total   | 100.00           | 100.00           |

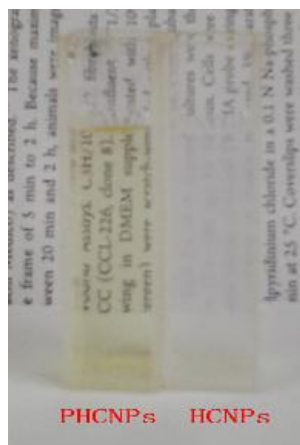

Figure S3. Photographs for the aqueous solutions of HCNP and PHCNP ( $[C] = 0.3$  mg/mL).

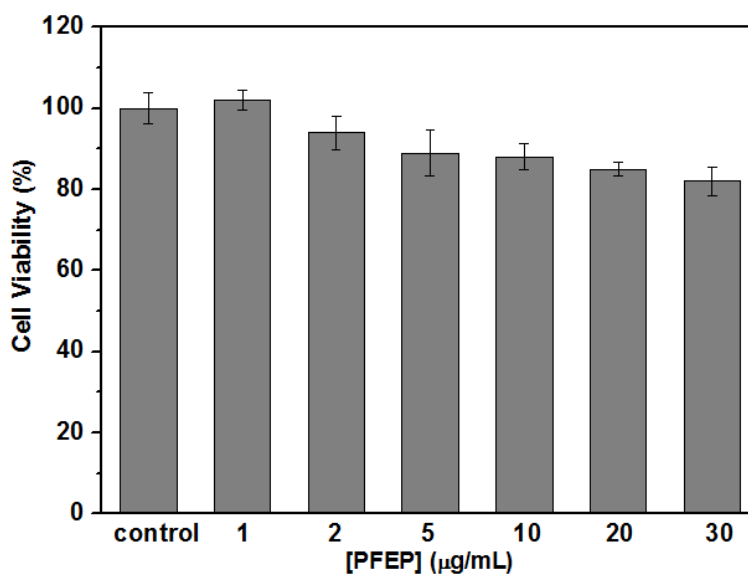

Figure S4. In vitro cell viability of HeLa cells after treatment with PFEP at different concentrations for 24 h.
